# Supplementary material
Source: Springer Nature journal article supplement (https://www.springermedizin.de/resource/supplementary/12876_2013_1176_MOESM2_ESM.pdf/9438274)

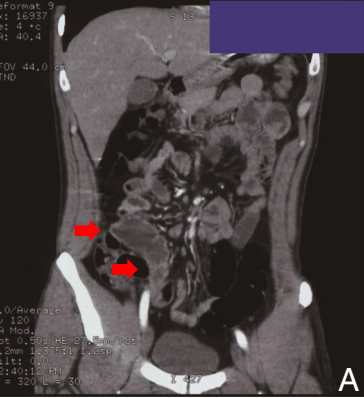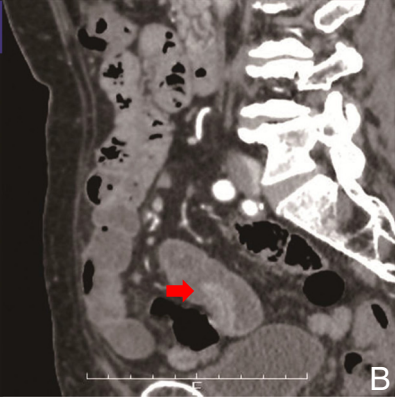

Supplement: MOESM2 [file 9438274]
